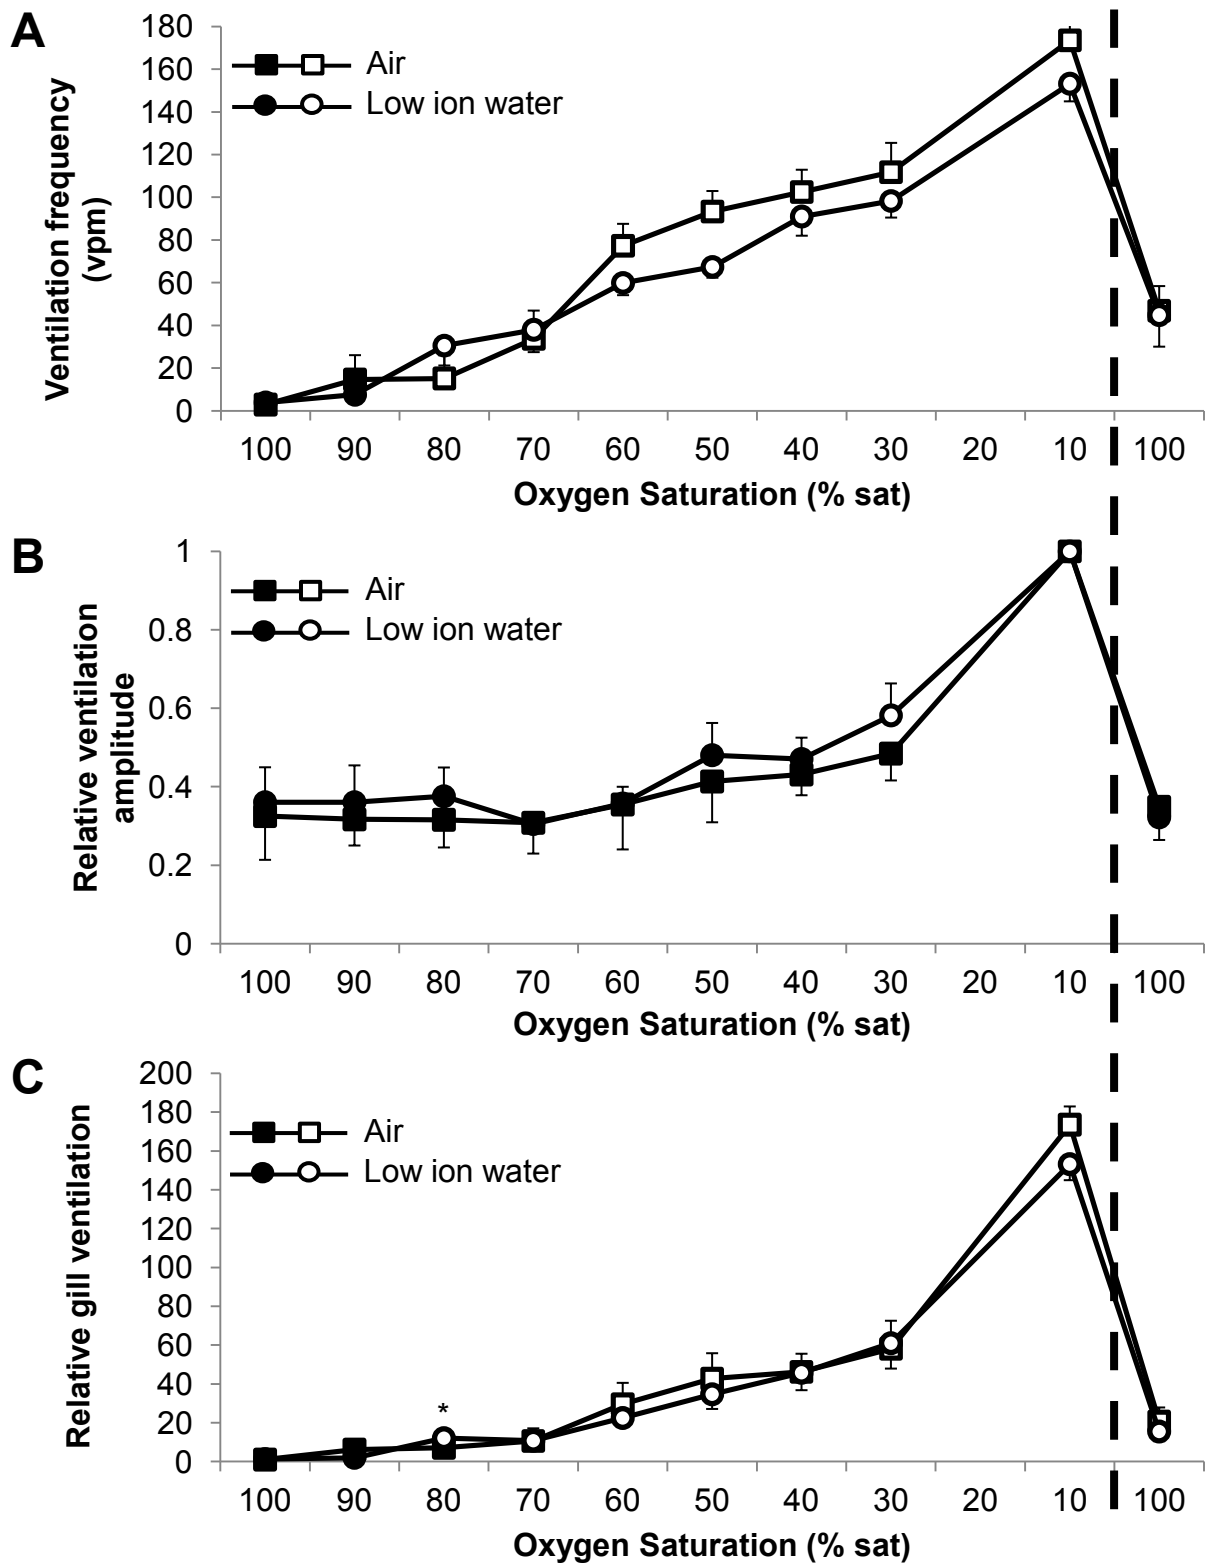

Fig. S1. Ventilatory (A) frequency, (B) amplitude and (C) total gill ventilation responses of *Kryptolebias marmoratus* acclimated for 7 days to air (squares,  $N=8$ ) or low ion water (circles,  $N=8$ ). Open symbols denote a significant difference from initial normoxic (100% oxygen saturation) values ( $P<0.05$ ). \*Significant difference from the control group at a given oxygen saturation ( $P<0.05$ ). Values are means  $\pm$  s.e.m.
